# Supplementary material
Source: Royal Society of Chemistry journal article supplement (doi:10.1039/d6gc00981f)
Supplement: d6gc00981f1.pdf [file d6gc00981f1.pdf]

# Revealing Sulfur-Resistant Pt–CeO<sub>2</sub> Interfacial Sites for Water–Gas Shift Catalysts toward Waste–to–Hydrogen

*Ga–Ram Hong<sup>a</sup>, Kyoung–Jin Kim<sup>a</sup>, Bong–Gyeong Shin<sup>a</sup> and Hyun–Seog Roh<sup>a,\*</sup>*

<sup>a</sup> *Department of Environmental and Energy Engineering, Yonsei University, 1 Yonseidae–gil, Wonju, Gangwon 26493, Republic of Korea.*

**\*Corresponding Authors**

Tel.: +82 33 760 2834, E–mail: [hsroh@yonsei.ac.kr](mailto:hsroh@yonsei.ac.kr) (H.–S. Roh)

Number of Pages: 11

Number of Figures: 8

Number of Tables: 1

## Catalysts Characterization

X-ray diffraction (XRD) patterns were recorded in a  $2\theta$  range of  $20^\circ$ – $80^\circ$  using an Ultima IV diffractometer (Rigaku) with Cu K $\alpha$  radiation (40 kV, 40 mA). The Brunauer–Emmett–Teller (BET) surface area and average pore diameter were obtained from N<sub>2</sub> adsorption–desorption isotherms measured at  $-196^\circ\text{C}$  using ASAP 2020 plus (Micromeritics). Prior to BET analysis, the samples were pretreated at  $110^\circ\text{C}$  for 12 h. The Pt<sup>0</sup> dispersion and the amount of chemisorbed CO of the catalysts were determined by pulsed CO–chemisorption using AutoChem 2920 (Micromeritics). Before CO injection, the samples were reduced in-situ under 10% H<sub>2</sub>/Ar at  $400^\circ\text{C}$  for 1 h, followed by cooling to  $50^\circ\text{C}$  in an Ar atmosphere. CO pulses were repeatedly introduced until the areas of successive CO uptake peaks became identical. The CO–to–surface Pt stoichiometry was assumed to be unity (CO/Pt = 1) for the calculation of Pt dispersion. The reduction behavior of the catalysts was investigated by H<sub>2</sub>–temperature–programed reduction (H<sub>2</sub>–TPR) using AutoChem 2920 (Micromeritics). Each sample was exposed to 10% H<sub>2</sub>/Ar and heated from  $50^\circ\text{C}$  to  $800^\circ\text{C}$  at a rate of  $10^\circ\text{C}/\text{min}$ . Raman spectroscopy was conducted using LabRam Aramis spectrometer (Horiba Jobin Yvon) with ND:YAG laser operating at an excitation wavelength of 532 nm. X-ray photoelectron spectroscopy (XPS) was carried out on a K–Alpha spectrometer (Thermo Fisher Scientific) with a monochromatic Al K $\alpha$  radiation source. The obtained spectra were adjusted using the C 1s line (284.6 eV) as a reference. To analyze the OSC of the catalysts, H<sub>2</sub>–O<sub>2</sub> pulse chemisorption was performed through AutoChem 2920 (Micromeritics). The samples were pretreated in a 10% O<sub>2</sub>/He atmosphere for 1 h while heating at  $400^\circ\text{C}$  prior to the pulse chemisorption. Subsequently, H<sub>2</sub> pulses (5% H<sub>2</sub>/Ar) were introduced at  $400^\circ\text{C}$  until the sample was fully saturated with hydrogen. Thereafter, O<sub>2</sub> pulses (1.5% O<sub>2</sub>/He) were injected until complete oxygen saturation was achieved. The OSC value was calculated from the amount of consumed O<sub>2</sub>. In situ CO diffuse reflectance infrared fourier transform spectroscopy (CO–DRIFTS) was employed to obtain the infrared spectra of the catalysts under reaction conditions. A Nicolet iS50 FTIR spectrometer (Thermo Fisher Scientific) fitted with a liquid–nitrogen–cooled mercury cadmium telluride (MCT) detector and a Praying Mantis kit (Harrick) was attached. The spectra were collected by accumulating 64 scans at  $8\text{ cm}^{-1}$  resolution. 35 mg of the catalyst was placed in a high–temperature reaction chamber with ZnSe windows and activated under a 5% H<sub>2</sub>/N<sub>2</sub> at  $400^\circ\text{C}$  for 1 h. After activation, the chamber cooled down to  $50^\circ\text{C}$  under N<sub>2</sub> flow. The reaction was then carried out with 2% CO/N<sub>2</sub> gas introduced at a rate of 20 sccm for 1 h.

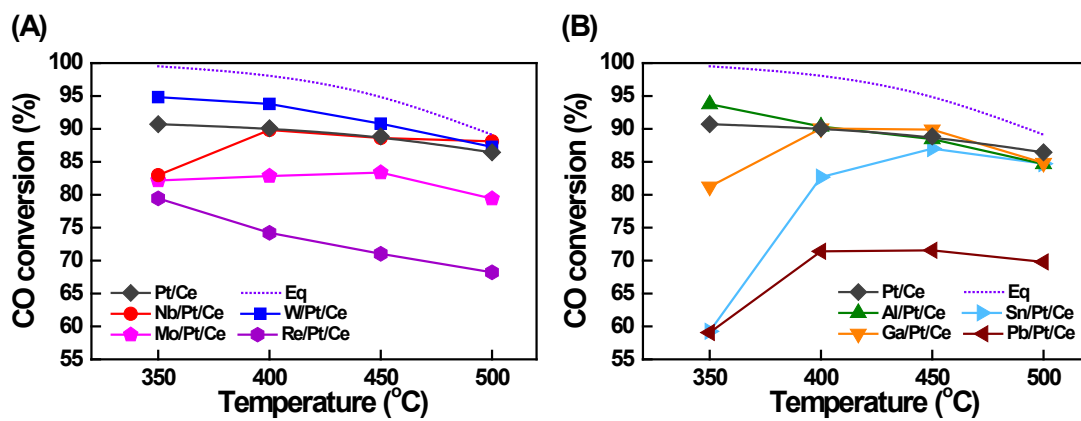

**Figure S1.** Catalytic performance of Pt/Ce catalysts with various metal promoters as a function of temperature. (A) Transition metal promoted catalysts; (B) Non-transition metal promoted catalysts.

Reaction conditions:  $\text{H}_2\text{O}/(\text{CH}_4 + \text{CO} + \text{CO}_2) = 2.0$ ;  $T = 400\text{ }^\circ\text{C}$ ;  $\text{GHSV} = 46,000\text{ mL}\cdot\text{g}^{-1}\cdot\text{h}^{-1}$ .

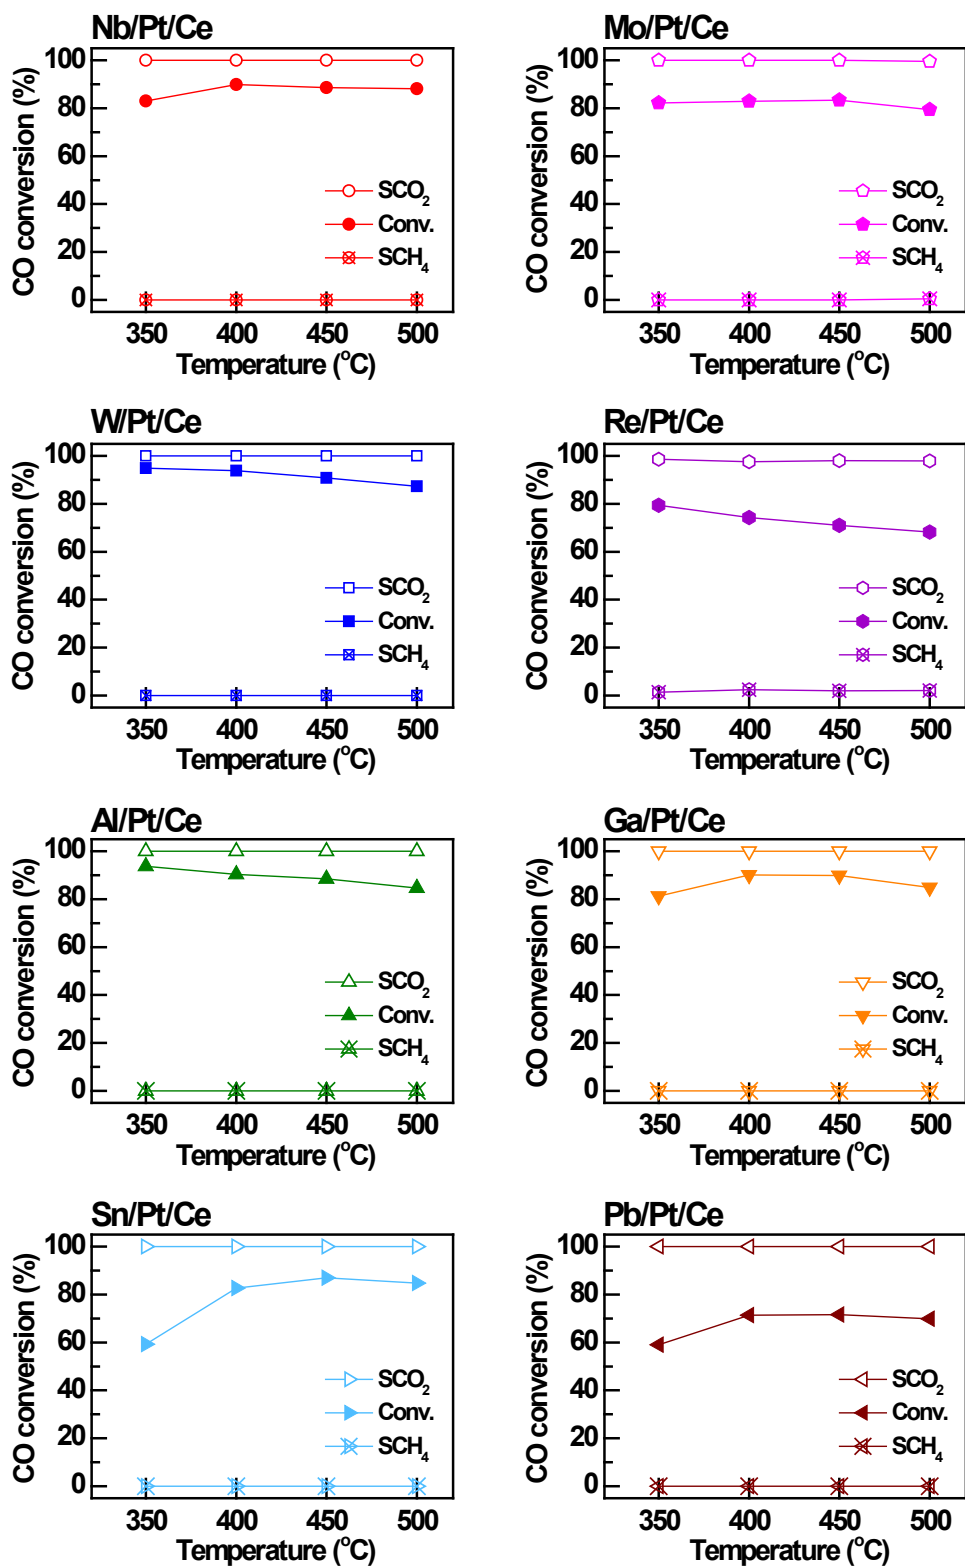

**Figure S2.** CO conversion,  $\text{CO}_2$  and  $\text{CH}_4$  selectivity of Pt/Ce catalysts with various metal promoters as a function of temperature. Reaction conditions:  $\text{H}_2\text{O}/(\text{CH}_4 + \text{CO} + \text{CO}_2) = 2.0$ ;  $T = 400$  °C; GHSV =  $46,000 \text{ mL} \cdot \text{g}^{-1} \cdot \text{h}^{-1}$ .

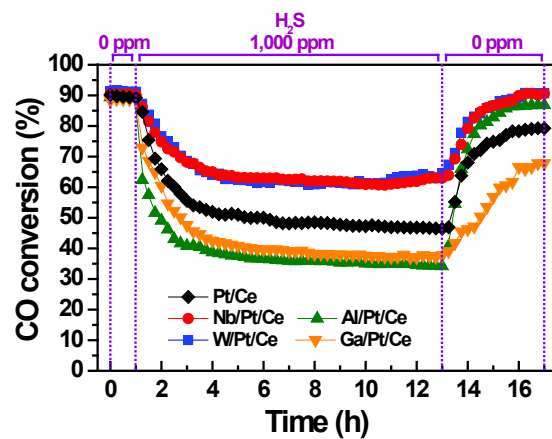

**Figure S3.** Catalytic performance with time on stream over the Pt/Ce catalysts with various metal promoters. Reaction conditions:  $\text{H}_2\text{O}/(\text{CH}_4 + \text{CO} + \text{CO}_2) = 2.0$ ;  $T = 400\text{ }^\circ\text{C}$ ;  $\text{GHSV} = 46,000\text{ mL}\cdot\text{g}^{-1}\cdot\text{h}^{-1}$ ;  $\text{H}_2\text{S} = 1,000\text{ ppm}$ .

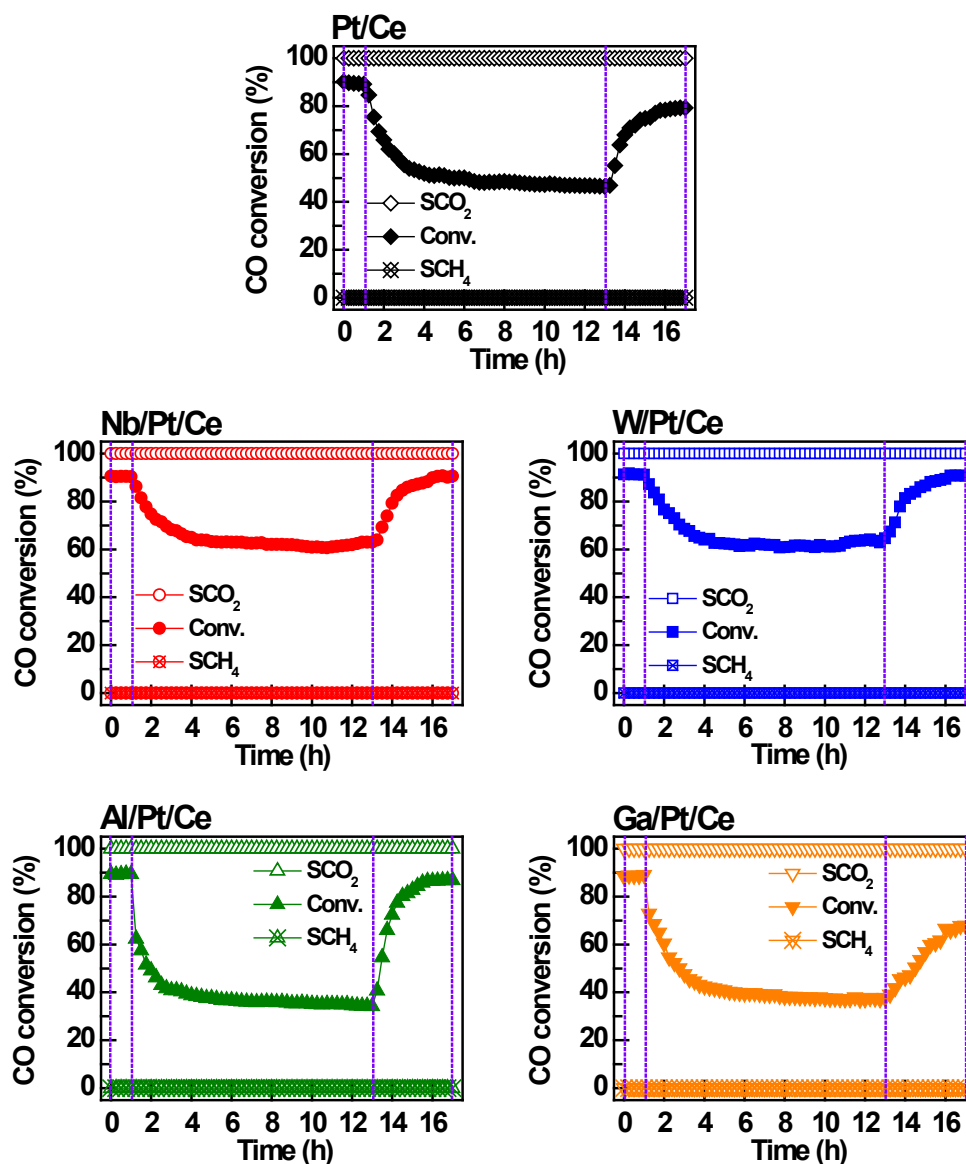

**Figure S4.** CO conversion, CO<sub>2</sub> and CH<sub>4</sub> selectivity with time on stream over the Pt/Ce catalysts

with various metal promoters. Reaction conditions:  $\text{H}_2\text{O}/(\text{CH}_4 + \text{CO} + \text{CO}_2) = 2.0$ ;  $T = 400\text{ }^\circ\text{C}$ ;

$$\text{GHSV} = 46,000\text{ mL}\cdot\text{g}^{-1}\cdot\text{h}^{-1}.$$

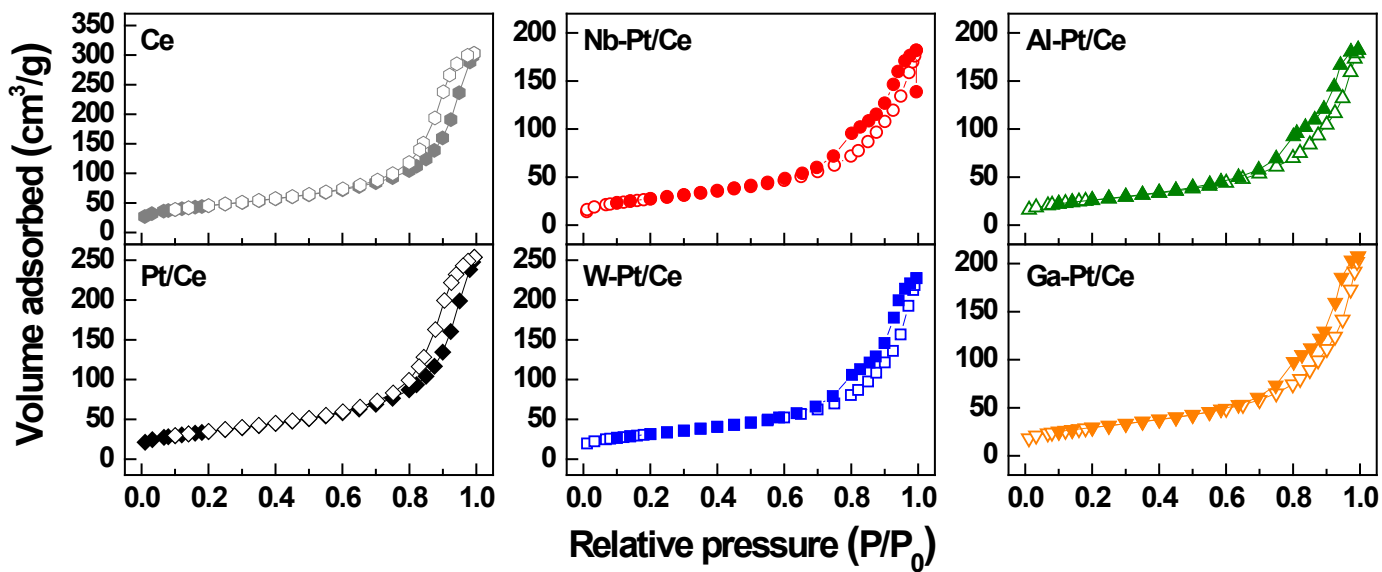

Figure S5. Adsorption-desorption curve of the CeO<sub>2</sub> support and Pt/Ce catalysts with various metal promoters.

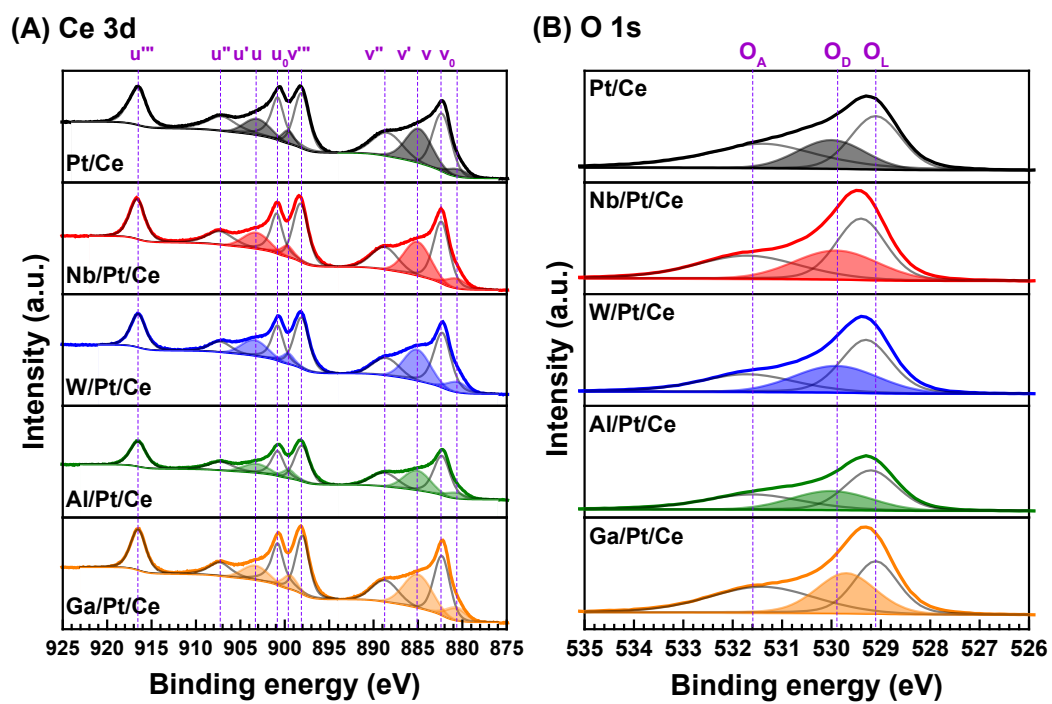

**Figure S6.** XPS spectra of the reduced Pt/Ce catalysts with various metal promoters.

(A) XPS Ce 3d spectra; (B) XPS O 1s spectra

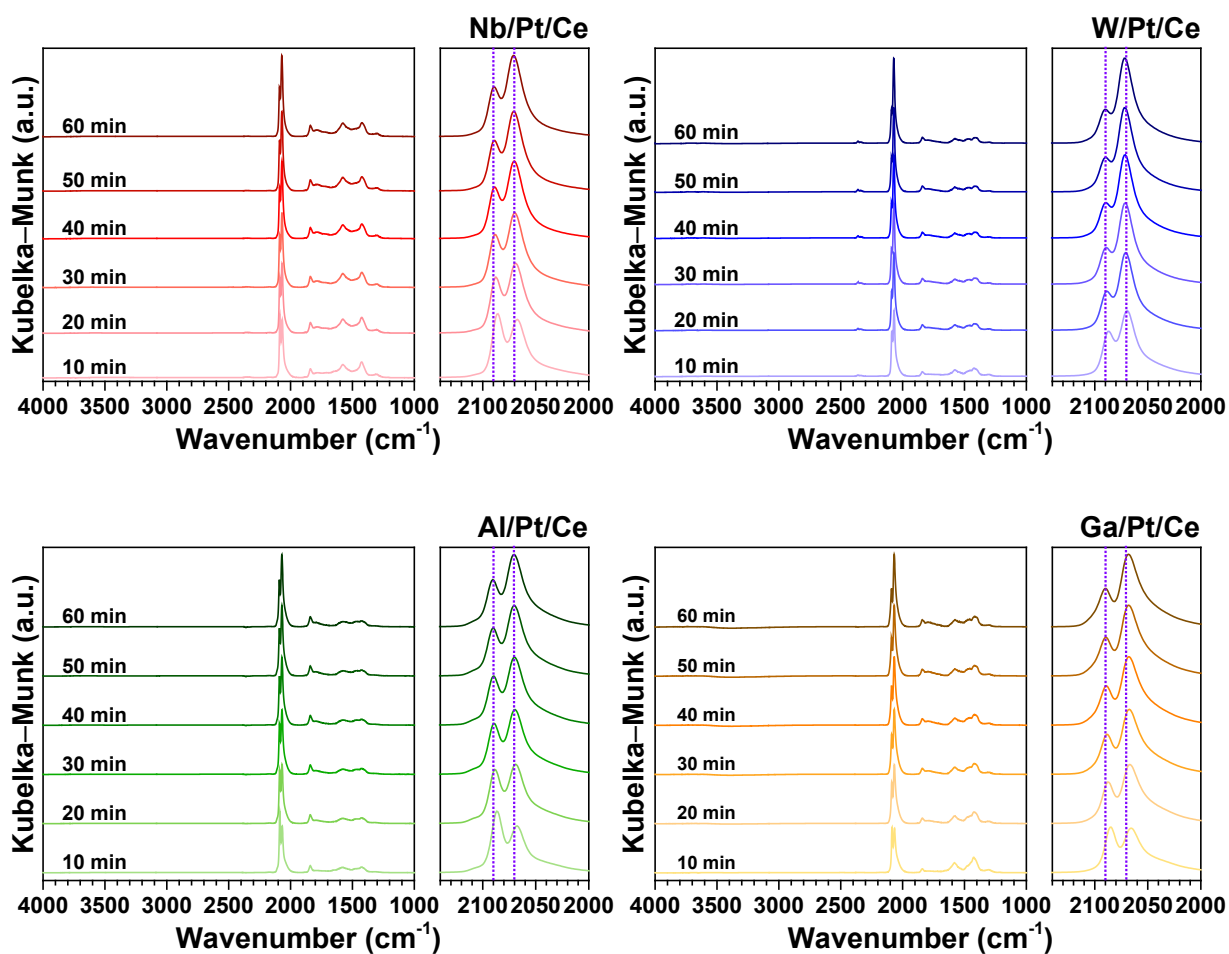

**Figure S7.** CO-DRIFTS spectra recorded in the 1,000–4,000 cm<sup>-1</sup> range at 50 °C over 60 min at 10 min intervals of CO adsorption on reduced Me/Pt/Ce catalysts with various metal promoters.

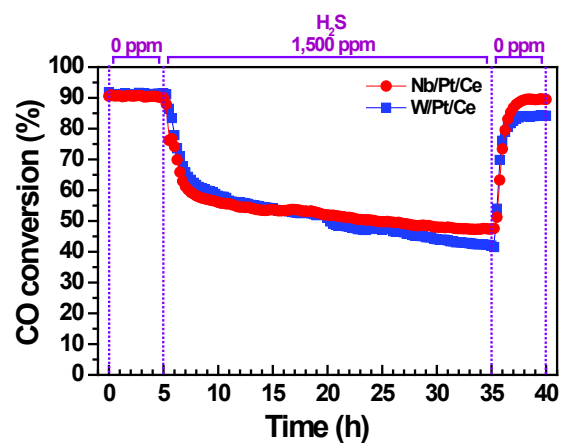

**Figure S8.** Catalytic performance with time on stream over Pt/Ce catalysts promoted with Nb and W.

Reaction conditions:  $\text{H}_2\text{O}/(\text{CH}_4 + \text{CO} + \text{CO}_2) = 2.0$ ;  $T = 400\text{ }^\circ\text{C}$ ;  $\text{GHSV} = 46,000\text{ mL}\cdot\text{g}^{-1}\cdot\text{h}^{-1}$ ;  $\text{H}_2\text{S} =$

1,500 ppm.

**Table S1.** Comparison of reported data and our results.

| <b>Catalyst</b>                                                      | <b>GHSV<br/>(h<sup>-1</sup>)</b> | <b>H<sub>2</sub>O/C</b> | <b>Temp.<br/>(°C)</b> | <b>CO conc.<br/>(%)</b> | <b>S conc.<br/>(ppm)</b> | <b>CO conv.<br/>(%)</b> |
|----------------------------------------------------------------------|----------------------------------|-------------------------|-----------------------|-------------------------|--------------------------|-------------------------|
| Nb/Pt/Ce                                                             | 46,000                           | 2.0                     | 400                   | 38.4% (dry)             | 1,000                    | 63                      |
| Pt/Ce <sup>1</sup>                                                   | 46,000                           | 2.0                     | 400                   | 38.4% (dry)             | 500                      | 80                      |
| CuOZnO(2)/HAP <sup>2</sup>                                           | 30,000                           | 1.3                     | 230                   | 15% (wet)               | 200                      | 16                      |
| Pt/Nb <sub>2</sub> O <sub>5</sub> <sup>3</sup>                       | 24,000                           | 1.3                     | 300                   | 15% (wet)               | 50                       | 28                      |
| Pt/Ce <sub>0.25</sub> Zr <sub>0.75</sub> O <sub>2</sub> <sup>4</sup> | 24,000                           | 1.3                     | 300                   | 15% (wet)               | 50                       | 19                      |
| FeCe <sup>5</sup>                                                    | 60,000                           | 1.5                     | 400                   | -                       | 400                      | 55                      |

## Supplementary References

- 1 K. J. Kim, Y. L. Lee, G. R. Hong, S. Y. Ahn, B. J. Kim, S. S. Lee, Y. Jeon and H. S. Roh, *Catal. Today*, DOI:10.1016/j.cattod.2023.114361.
- 2 C. C. de Souza, L. P. C. Silva, L. E. Terra, A. C. S. L. S. Coutinho, Y. Xing and F. B. Passos, *Catal. Today*, DOI:10.1016/j.cattod.2025.115480.
- 3 L. P. C. Silva, M. M. Freitas, R. M. Santos, G. Perez, L. E. Terra, A. C. S. L. S. Coutinho and F. B. Passos, *Int. J. Hydrogen Energy*, 2018, **43**, 3190–3202.
- 4 L. P. C. Silva, L. E. Terra, A. C. S. L. S. Coutinho and F. B. Passos, *J. Catal.*, 2016, **341**, 1–12.
- 5 G. K. Reddy, P. Boolchand and P. G. Smirniotis, *J. Catal.*, 2011, **282**, 258–269.
